# Supplementary material for: Erratum: Genetic loci associated with heart rate variability and their effects on cardiac disease risk
Source: PubMed Central journal article supplement (PMC5543301; doi:10.1038/ncomms16140), 2017-08-02

(a)

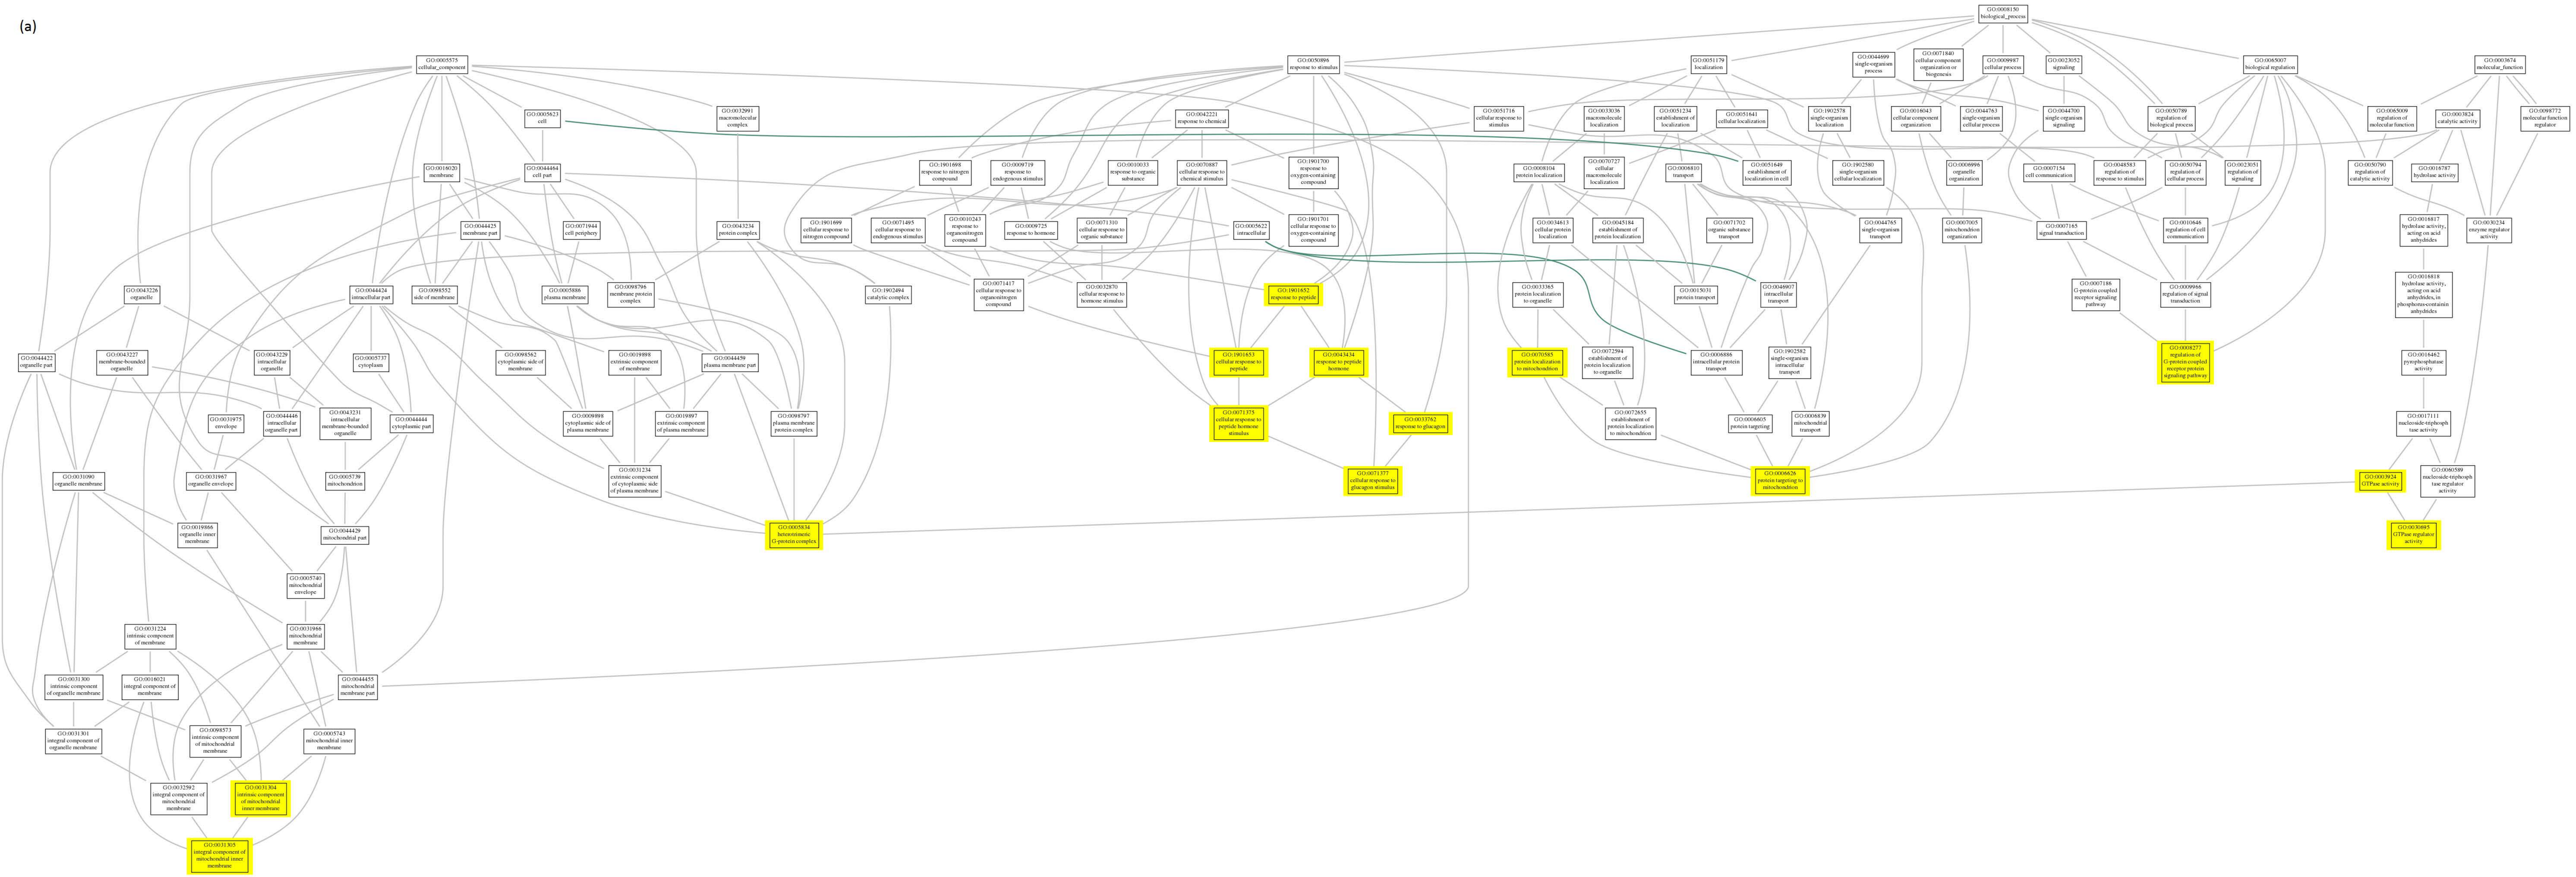

(b)

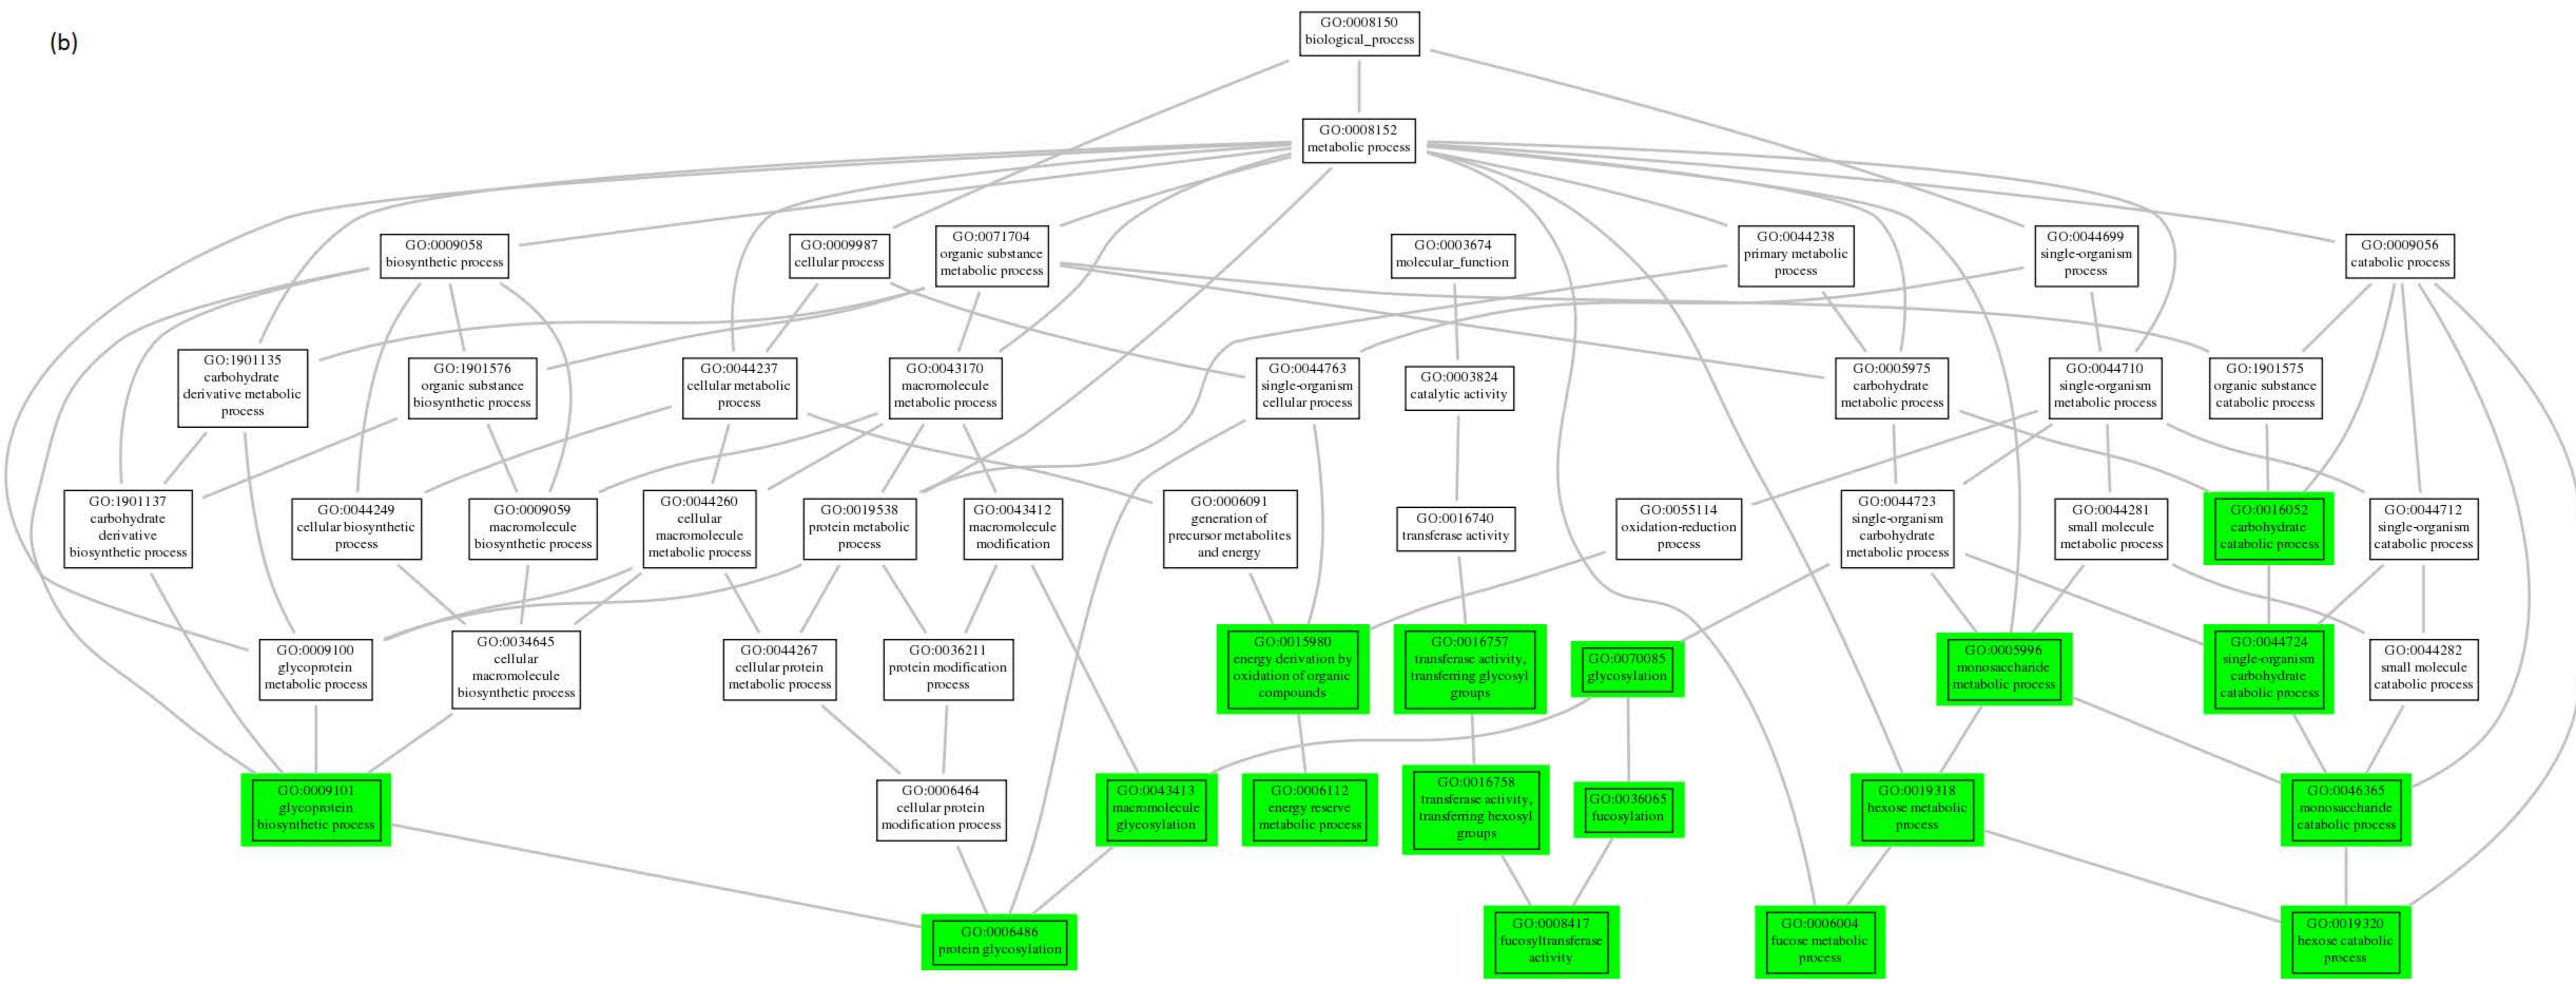

Supplement: ncomms16140-s1.pdf [file ncomms16140-s1.pdf]
